# Supplementary material for: Magnetic cooling: a molecular perspective
Source: Royal Society of Chemistry journal article supplement (doi:10.1039/d2dt01565j), 2022-01-01
Supplement: d2dt01565j1.pdf [file d2dt01565j1.pdf]

## Supplementary Information

### Magnetic cooling: a molecular perspective

Piotr Konieczny,<sup>\*a</sup> Wojciech Sas,<sup>a</sup> Dominik Czernia,<sup>a</sup> Aleksandra Pacanowska,<sup>a</sup> Magdalena Fitta,<sup>a</sup> and Robert Pełka<sup>a</sup>

<sup>a</sup>Institute of Nuclear Physics PAN, Radzikowskiego 152, 31-342 Kraków, Poland.

E-mail: piotr.konieczny@ifj.edu.pl

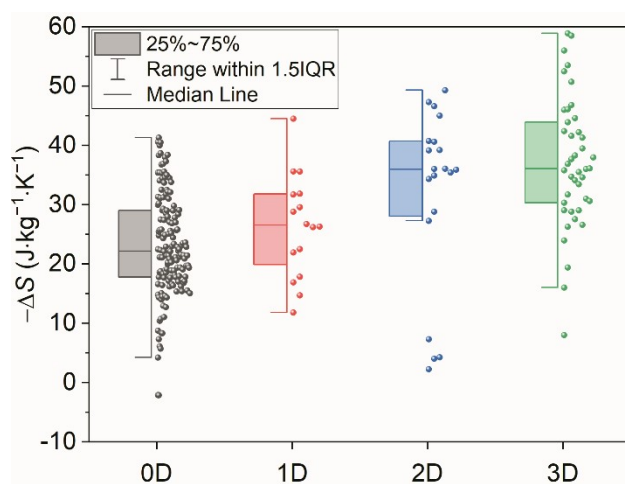

Fig.S1. Magnetic entropy change ( $\mu_0\Delta H = 7$  T) for the conventional MCE in molecular magnets of different structural dimensionality.
